# Supplementary material
Source: bioRxiv or medRxiv preprint supplement (https://www.medrxiv.org/highwire/filestream/69434/field_highwire_adjunct_files/1/19008664-2.pdf)

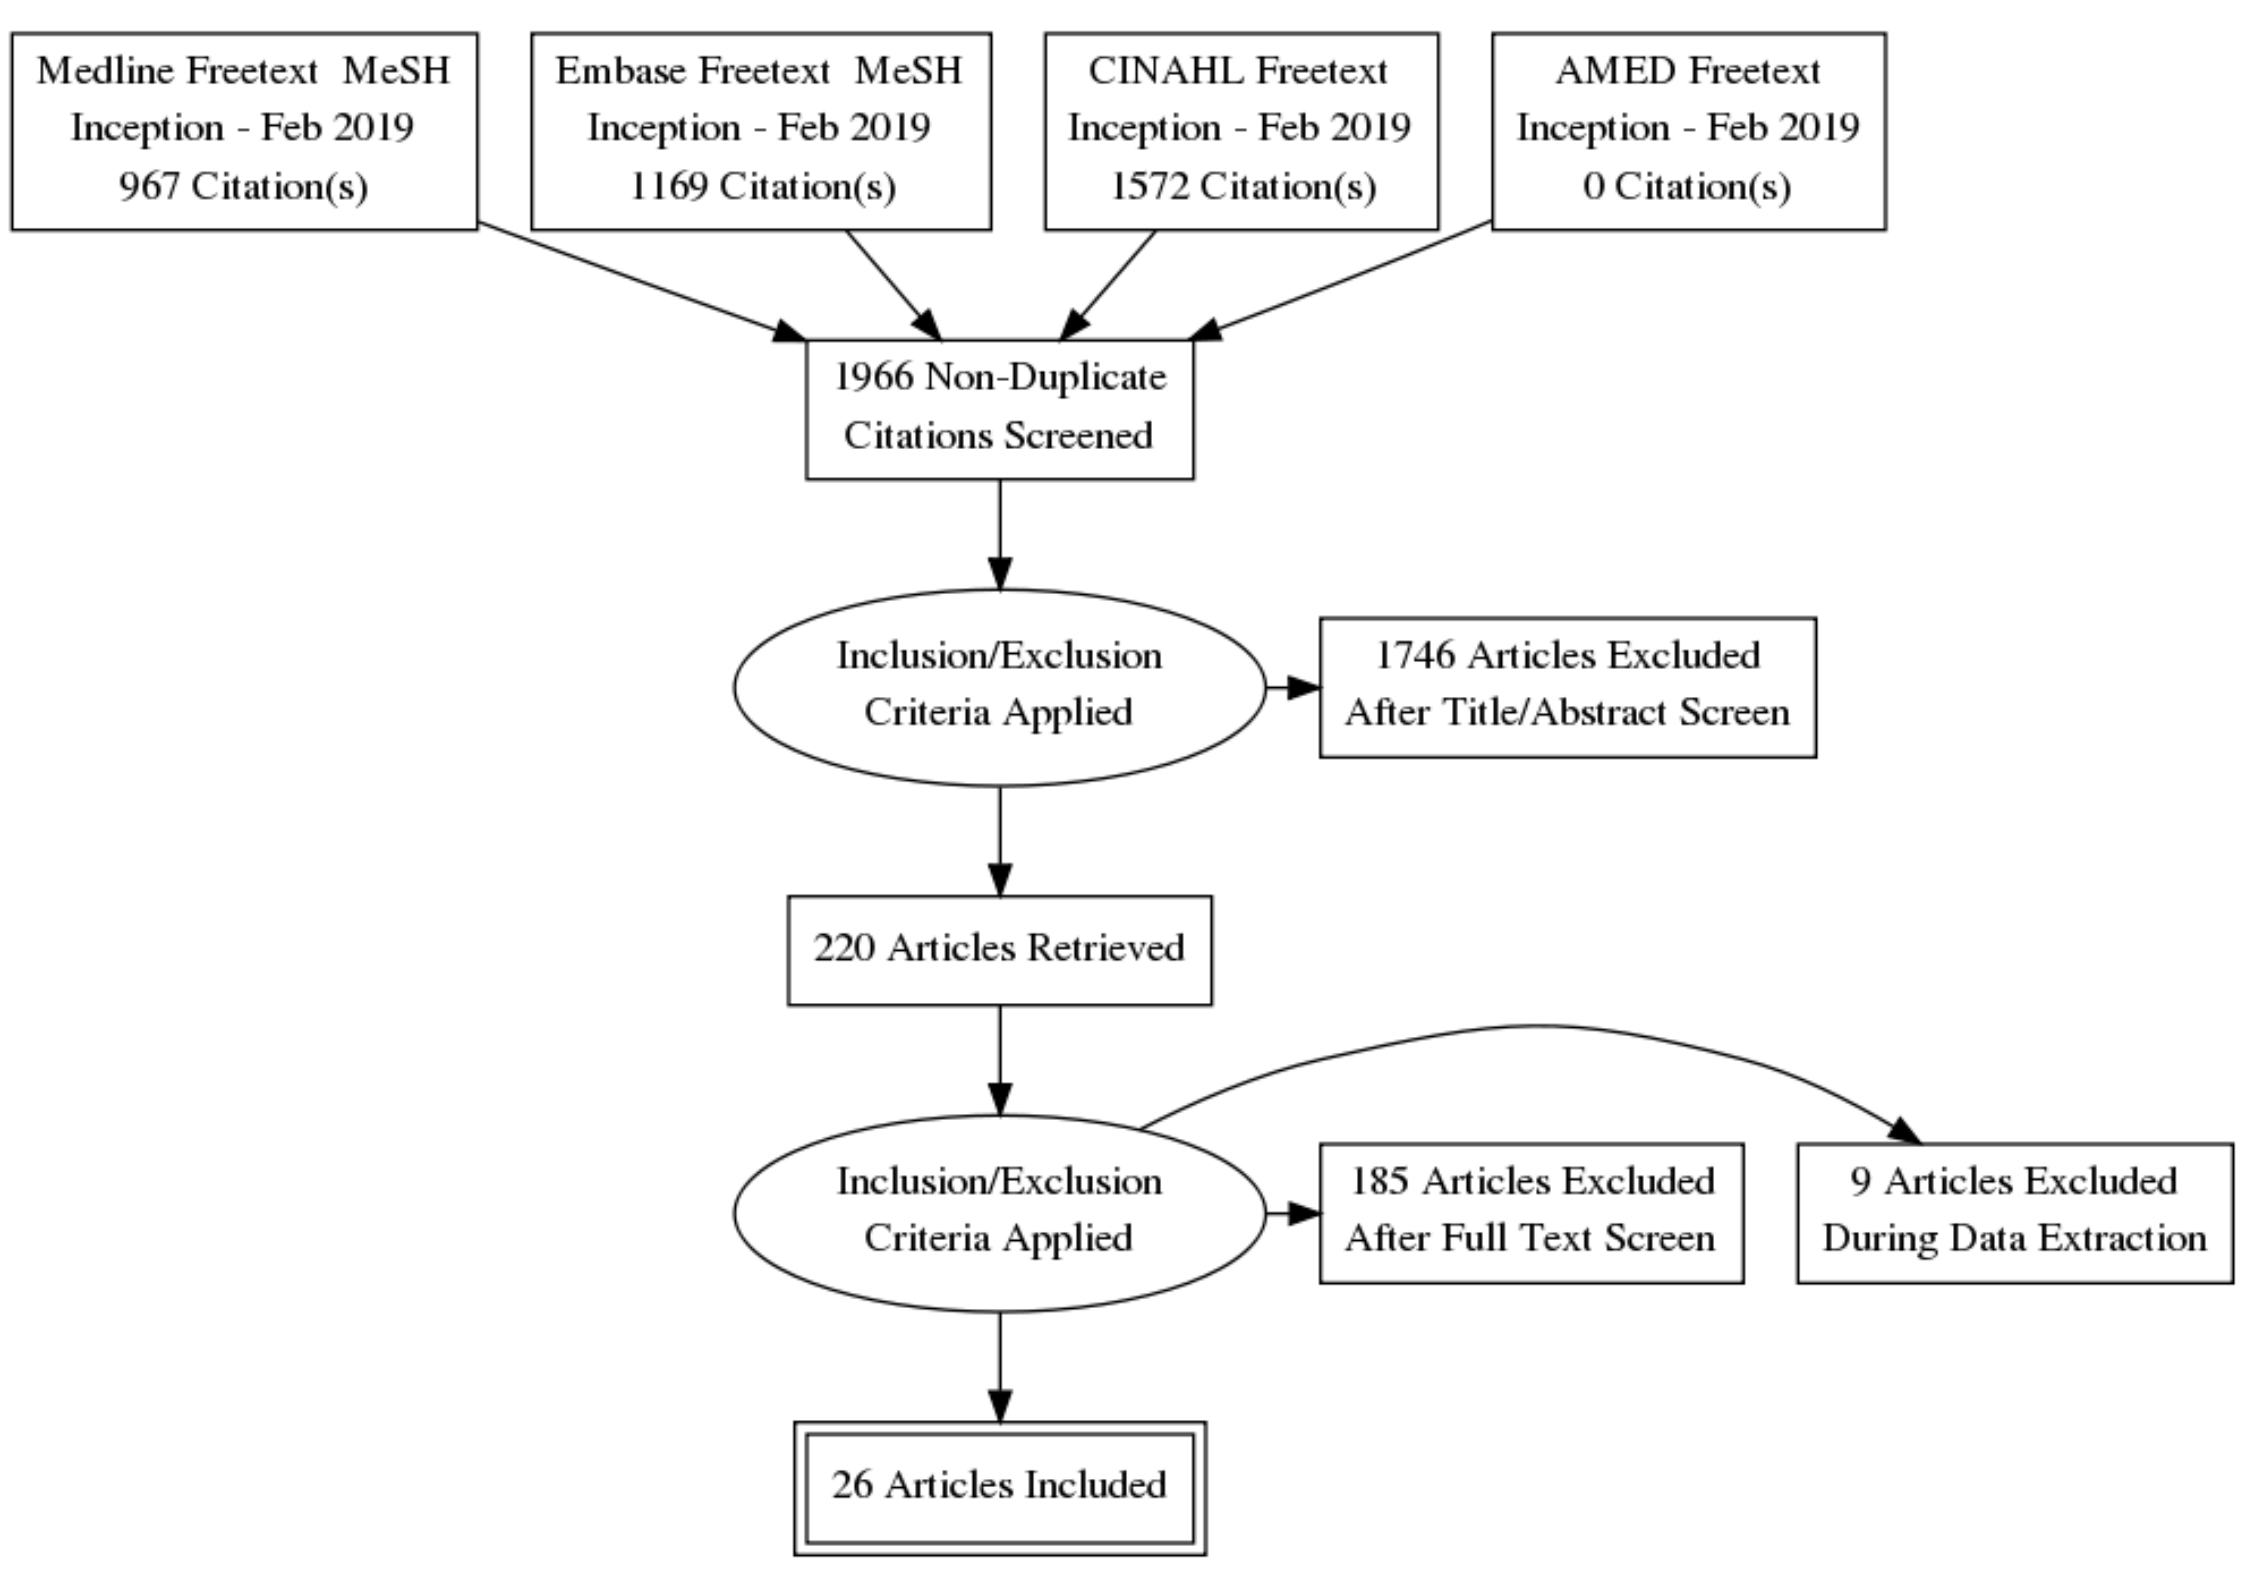

Supplement: Supplementary file [file 19008664-2.pdf]
